# Supplementary material
Source: publisher figshare collection journal article supplement (https://gsapubs.figshare.com/ndownloader/files/40838723)
Supplement: Supplementary file 1 [file 40838723]

## Sheet: Sheet1
Table S4. Key apatite trace element ratios and U-Pb age information of bedrocks of the eastern Yanshan fold belt, northeastern Asia.
Publication Number	T-W Intercept Age (Ma)	MSWD	Eu/Eu*	Ce/Ce*	LOG(La/Lu)CN	(La/Sm)CN	LOG(Ce/Yb)CN	Sr/Y	Th/U
Y1	1775.4 ± 5.6	2.9	0.75 (0.48-1.0)	0.98 (0.62-1.39)	2.71 (2.02-3.65)	6.39 (3.02-9.47)	2.38 (1.93-3.06)	5.17 (2.81-8.98)	1.86 (1.12-2.94)
Y2	Group 1: 1416.0 ± 38.7 Group 2: 1578.6 ± 53.3	2.4 | 1.9	0.35 (0.20-0.59)	0.79 (0.53-1.12)	1.49 (0.80-2.74)	2.45 (1.00-6.73)	1.58 (0.99-2.59)	1.89 (0.37-5.81)	1.11 (0.24-2.16)
Y3	1766.05 ± 8.27	0.9	0.23 (0.18-0.28)	0.63 (0.44-0.87)	1.31 (0.75-1.97)	1.53 (0.34-3.80)	1.44 (1.03-2.18)	1.33 (0.98-2.56 )	0.59 (0.09-1.28)
Y5	170.8 ± 19.4	1.3	0.42 (0.34-0.70)	1.04 (0.56-1.37 )	0.11 (-0.34-0.45)	0.69 (0.52-1.15)	0.18 (-0.24-0.44)	0.63 (0.36-2.10)	0.39 (0.02-0.99)
Notes: The numbers outside parentheses represent the average ratio, whereas these numbers in parentheses indicate the range of ratios.
